# Supplementary material
Source: PubMed Central journal article supplement (PMC5277511)
Supplement: JCM.02044-16_zjm999095336s1.pdf [file JCM.02044-16_zjm999095336s1.pdf]

**Table S1.** EBV viral load by assay

| Challenge   | Assay       | log <sub>10</sub> Copies/mL |             |              |       | log <sub>10</sub> IU/mL |             |              |       |
|-------------|-------------|-----------------------------|-------------|--------------|-------|-------------------------|-------------|--------------|-------|
|             |             | N                           | Mean (SD)   | Median (IQR) | Range | N                       | Mean (SD)   | Median (IQR) | Range |
| VLS/VLS2-05 | Abbott      | 4                           | 5.15 (0.54) | 4.97 (0.67)  | 1.21  | 1                       | 4.66 (—)    | 4.66 (0.00)  | 0.00  |
|             | Focus       | 11                          | 4.61 (0.54) | 4.46 (0.65)  | 1.88  | 2                       | 4.52 (0.08) | 4.52 (0.12)  | 0.12  |
|             | LDT         | 36                          | 4.54 (0.64) | 4.52 (0.80)  | 2.94  | 1                       | 3.33 (—)    | 3.33 (0.00)  | 0.00  |
|             | Luminex     | 1                           | 4.57 (—)    | 4.57 (0.00)  | 0.00  | 1                       | 5.30 (—)    | 5.30 (0.00)  | 0.00  |
|             | Nanogen*    | 8                           | 4.41 (0.59) | 4.23 (0.56)  | 1.81  |                         |             |              |       |
|             | Other       | 9                           | 4.13 (0.69) | 4.50 (0.62)  | 1.96  | 4                       | 4.51 (0.32) | 4.56 (0.54)  | 0.66  |
|             | Qiagen      | 32                          | 4.83 (0.47) | 4.87 (0.50)  | 2.62  | 1                       | 4.34 (—)    | 4.34 (0.00)  | 0.00  |
|             | Roche Other | 27                          | 4.48 (0.50) | 4.38 (0.66)  | 2.00  |                         |             |              |       |
|             | Tib Molbiol | 6                           | 4.85 (0.54) | 4.86 (0.99)  | 1.36  |                         |             |              |       |
| VLS/VLS2-06 | Abbott      | 4                           | 2.96 (0.18) | 2.97 (0.28)  | 0.42  | 1                       | 2.66 (—)    | 2.66 (0.00)  | 0.00  |
|             | Focus       | 7                           | 2.88 (0.48) | 2.74 (0.45)  | 1.43  | 2                       | 2.67 (0.33) | 2.67 (0.47)  | 0.47  |
|             | LDT         | 24                          | 2.94 (0.51) | 2.95 (0.64)  | 1.97  |                         |             |              |       |
|             | Luminex     | 1                           | 2.79 (—)    | 2.79 (0.00)  | 0.00  | 1                       | 3.00 (—)    | 3.00 (0.00)  | 0.00  |
|             | Nanogen*    | 8                           | 2.47 (0.47) | 2.47 (0.41)  | 1.60  |                         |             |              |       |
|             | Other       | 5                           | 2.62 (0.67) | 2.71 (0.50)  | 1.83  | 3                       | 2.51 (0.51) | 2.38 (1.00)  | 1.00  |
|             | Qiagen      | 23                          | 3.16 (0.65) | 3.10 (0.56)  | 3.11  | 1                       | 2.14 (—)    | 2.14 (0.00)  | 0.00  |
|             | Roche Other | 19                          | 3.18 (0.51) | 3.20 (0.58)  | 2.43  |                         |             |              |       |
|             | Tib Molbiol | 5                           | 3.05 (0.37) | 3.25 (0.28)  | 0.88  |                         |             |              |       |
| VLS/VLS2-15 | Abbott      | 4                           | 2.89 (0.42) | 2.93 (0.55)  | 1.03  |                         |             |              |       |
|             | Focus       | 8                           | 2.86 (0.51) | 2.70 (0.48)  | 1.62  | 4                       | 2.82 (0.16) | 2.78 (0.25)  | 0.34  |
|             | LDT         | 30                          | 2.87 (0.51) | 2.80 (0.61)  | 2.28  | 3                       | 2.28 (0.07) | 2.29 (0.14)  | 0.14  |
|             | Luminex     | 1                           | 2.89 (—)    | 2.89 (0.00)  | 0.00  |                         |             |              |       |
|             | Nanogen*    | 7                           | 2.82 (0.58) | 2.79 (0.28)  | 1.95  |                         |             |              |       |
|             | Other       | 10                          | 2.72 (0.53) | 2.58 (0.82)  | 1.73  | 5                       | 2.57 (0.36) | 2.60 (0.30)  | 0.91  |

| Challenge   | Assay       | log <sub>10</sub> Copies/mL |             |              |       | log <sub>10</sub> IU/mL |             |              |       |
|-------------|-------------|-----------------------------|-------------|--------------|-------|-------------------------|-------------|--------------|-------|
|             |             | N                           | Mean (SD)   | Median (IQR) | Range | N                       | Mean (SD)   | Median (IQR) | Range |
|             | Qiagen      | 24                          | 2.93 (0.54) | 3.00 (0.57)  | 2.10  | 2                       | 2.47 (0.44) | 2.47 (0.62)  | 0.62  |
|             | Roche Other | 16                          | 3.11 (0.55) | 3.07 (0.46)  | 2.30  |                         |             |              |       |
|             | Tib Molbiol | 3                           | 2.52 (0.42) | 2.30 (0.75)  | 0.75  | 1                       | 2.03 (—)    | 2.03 (0.00)  | 0.00  |
| VLS/VLS2-16 | Abbott      | 4                           | 3.88 (0.21) | 3.85 (0.28)  | 0.51  |                         |             |              |       |
|             | Focus       | 11                          | 3.44 (0.64) | 3.26 (0.95)  | 2.06  | 4                       | 3.56 (0.39) | 3.62 (0.63)  | 0.83  |
|             | LDT         | 35                          | 3.57 (0.67) | 3.55 (0.68)  | 2.78  | 3                       | 3.17 (0.11) | 3.12 (0.20)  | 0.20  |
|             | Luminex     | 1                           | 3.62 (—)    | 3.62 (0.00)  | 0.00  |                         |             |              |       |
|             | Nanogen*    | 10                          | 3.57 (0.53) | 3.49 (0.65)  | 1.73  |                         |             |              |       |
|             | Other       | 11                          | 3.43 (0.38) | 3.59 (0.77)  | 1.01  | 5                       | 3.57 (0.14) | 3.50 (0.21)  | 0.31  |
|             | Qiagen      | 33                          | 3.77 (0.44) | 3.77 (0.62)  | 1.91  | 2                       | 3.49 (0.35) | 3.49 (0.50)  | 0.50  |
|             | Roche Other | 27                          | 3.50 (0.63) | 3.40 (0.78)  | 2.62  |                         |             |              |       |
|             | Tib Molbiol | 4                           | 3.59 (0.46) | 3.77 (0.53)  | 1.01  | 1                       | 2.97 (—)    | 2.97 (0.00)  | 0.00  |
| VLS2-25     | Focus       | 2                           | 2.89 (0.83) | 2.89 (1.18)  | 1.18  |                         |             |              |       |
|             | LDT         | 10                          | 2.73 (0.30) | 2.70 (0.48)  | 0.99  | 2                       | 1.92 (0.12) | 1.92 (0.17)  | 0.17  |
|             | Nanogen*    | 2                           | 2.82 (0.54) | 2.82 (0.77)  | 0.77  |                         |             |              |       |
|             | Other       | 2                           | 1.94 (1.11) | 1.94 (1.57)  | 1.57  | 1                       | 1.92 (—)    | 1.92 (0.00)  | 0.00  |
|             | Qiagen      | 5                           | 2.58 (0.16) | 2.54 (0.19)  | 0.40  | 2                       | 2.23 (0.33) | 2.23 (0.46)  | 0.46  |
|             | Roche Other | 1                           | 2.75 (—)    | 2.75 (0.00)  | 0.00  |                         |             |              |       |
|             | Tib Molbiol | 1                           | 2.30 (—)    | 2.30 (0.00)  | 0.00  |                         |             |              |       |

2 N, number of labs; SD, standard deviation; IQR, interquartile range; LDT, Lab Developed Test

3 \*Now ELITech

**Table S2. BKV viral load by assay**

| Sample      | Assay              | log <sub>10</sub> Copies/mL |             |              |       |
|-------------|--------------------|-----------------------------|-------------|--------------|-------|
|             |                    | N                           | Mean (SD)   | Median (IQR) | Range |
| VLS/VLS2-01 | Focus Diagnostics  | 18                          | 5.73 (0.40) | 5.81 (0.52)  | 1.56  |
|             | Lab Developed Test | 46                          | 5.91 (0.55) | 5.86 (0.82)  | 2.20  |
|             | Luminex            | 17                          | 5.64 (0.35) | 5.57 (0.34)  | 1.34  |
|             | Nanogen*           | 22                          | 5.62 (0.57) | 5.62 (0.52)  | 2.75  |
|             | Other              | 18                          | 5.49 (0.69) | 5.58 (0.28)  | 3.12  |
|             | Qiagen             | 10                          | 5.67 (0.50) | 5.70 (0.64)  | 1.67  |
|             | Roche Other        | 1                           | 6.29 (—)    | 6.29 (0.00)  | 0.00  |
|             | Tib Molbiol        | 14                          | 5.80 (0.51) | 5.84 (0.74)  | 1.59  |
| VLS/VLS2-11 | Abbott             | 1                           | 5.01 (—)    | 5.01 (0.00)  | 0.00  |
|             | Focus Diagnostics  | 24                          | 4.38 (0.44) | 4.39 (0.57)  | 1.94  |
|             | Lab Developed Test | 47                          | 4.63 (0.46) | 4.65 (0.49)  | 2.40  |
|             | Luminex            | 17                          | 4.54 (0.41) | 4.57 (0.60)  | 1.34  |
|             | Nanogen*           | 16                          | 4.51 (0.46) | 4.54 (0.33)  | 2.23  |
|             | Other              | 19                          | 4.34 (0.54) | 4.16 (0.69)  | 2.53  |
|             | Qiagen             | 11                          | 4.31 (0.23) | 4.32 (0.41)  | 0.74  |
|             | Roche Other        | 1                           | 3.80 (—)    | 3.80 (0.00)  | 0.00  |
| Tib Molbiol | 13                 | 4.60 (0.46)                 | 4.75 (0.48) | 1.51         |       |
| VLS/VLS2-12 | Abbott             | 1                           | 3.31 (—)    | 3.31 (0.00)  | 0.00  |
|             | Focus Diagnostics  | 19                          | 2.98 (0.38) | 3.00 (0.44)  | 1.56  |
|             | Lab Developed Test | 41                          | 3.12 (0.45) | 3.00 (0.56)  | 1.88  |
|             | Luminex            | 13                          | 3.08 (0.38) | 3.08 (0.53)  | 1.37  |
|             | Nanogen*           | 15                          | 3.04 (0.36) | 2.99 (0.70)  | 1.03  |
|             | Other              | 15                          | 2.84 (0.66) | 2.78 (0.65)  | 3.06  |
|             | Qiagen             | 9                           | 2.79 (0.38) | 2.78 (0.39)  | 1.28  |

| Sample  | Assay              | log <sub>10</sub> Copies/mL |             |              |       |
|---------|--------------------|-----------------------------|-------------|--------------|-------|
|         |                    | N                           | Mean (SD)   | Median (IQR) | Range |
|         | Roche Other        | 1                           | 3.07 (—)    | 3.07 (0.00)  | 0.00  |
|         | Tib Molbiol        | 9                           | 3.05 (0.39) | 2.99 (0.46)  | 1.31  |
| VLS2-21 | Focus Diagnostics  | 7                           | 4.08 (0.60) | 4.17 (0.96)  | 1.77  |
|         | Lab Developed Test | 16                          | 4.45 (0.73) | 4.27 (1.15)  | 2.46  |
|         | Luminex            | 1                           | 4.00 (—)    | 4.00 (0.00)  | 0.00  |
|         | Nanogen*           | 2                           | 4.50 (0.70) | 4.50 (0.99)  | 0.99  |
|         | Other              | 6                           | 4.34 (0.76) | 4.18 (1.25)  | 1.88  |
|         | Qiagen             | 5                           | 3.99 (0.78) | 4.39 (1.05)  | 1.82  |
|         | Tib Molbiol        | 4                           | 4.83 (0.51) | 4.89 (0.84)  | 1.09  |
| VLS2-22 | Focus Diagnostics  | 7                           | 6.04 (0.55) | 6.03 (0.89)  | 1.59  |
|         | Lab Developed Test | 17                          | 6.38 (0.74) | 6.48 (0.87)  | 2.70  |
|         | Luminex            | 1                           | 6.08 (—)    | 6.08 (0.00)  | 0.00  |
|         | Nanogen*           | 2                           | 6.61 (0.57) | 6.61 (0.81)  | 0.81  |
|         | Other              | 6                           | 6.45 (0.76) | 6.26 (1.47)  | 1.70  |
|         | Qiagen             | 5                           | 6.04 (0.51) | 6.14 (0.48)  | 1.34  |
|         | Tib Molbiol        | 4                           | 6.72 (0.65) | 6.89 (0.88)  | 1.50  |

5 N, number of labs; SD, standard deviation; IQR, interquartile range

6 \*Now ELITech

**Table S3.** ADV viral load by assay

| Sample  | Assay              | log <sub>10</sub> Copies/mL |             |              |       |
|---------|--------------------|-----------------------------|-------------|--------------|-------|
|         |                    | N                           | Mean (SD)   | Median (IQR) | Range |
| VLS2-07 | Focus Diagnostics  | 3                           | 4.62 (0.25) | 4.52 (0.47)  | 0.47  |
|         | Lab Developed Test | 17                          | 4.64 (0.60) | 4.71 (0.84)  | 2.13  |
|         | Nanogen*           | 1                           | 5.40 (—)    | 5.40 (0.00)  | 0.00  |
|         | Other              | 3                           | 3.79 (0.64) | 4.12 (1.15)  | 1.15  |
|         | Tib Molbiol        | 2                           | 4.69 (0.30) | 4.69 (0.42)  | 0.42  |
| VLS2-08 | Focus Diagnostics  | 3                           | 5.04 (0.77) | 5.13 (1.53)  | 1.53  |
|         | Lab Developed Test | 17                          | 5.39 (1.25) | 4.75 (1.85)  | 3.60  |
|         | Nanogen*           | 1                           | 5.80 (—)    | 5.80 (0.00)  | 0.00  |
|         | Other              | 3                           | 4.69 (0.23) | 4.62 (0.44)  | 0.44  |
|         | Tib Molbiol        | 2                           | 5.76 (0.63) | 5.76 (0.89)  | 0.89  |
| VLS2-17 | Focus Diagnostics  | 6                           | 5.19 (0.70) | 5.16 (1.19)  | 1.80  |
|         | Lab Developed Test | 16                          | 5.39 (0.48) | 5.34 (0.75)  | 1.83  |
|         | Nanogen*           | 1                           | 5.30 (—)    | 5.30 (0.00)  | 0.00  |
|         | Other              | 5                           | 5.30 (1.09) | 5.25 (0.95)  | 2.91  |
|         | Tib Molbiol        | 3                           | 5.31 (0.99) | 5.36 (1.98)  | 1.98  |
| VLS2-18 | Focus Diagnostics  | 6                           | 5.82 (0.99) | 5.99 (0.74)  | 2.70  |
|         | Lab Developed Test | 16                          | 5.71 (1.09) | 5.97 (0.73)  | 4.67  |
|         | Nanogen*           | 1                           | 6.80 (—)    | 6.80 (0.00)  | 0.00  |
|         | Other              | 5                           | 5.94 (1.27) | 5.72 (0.98)  | 3.44  |
|         | Tib Molbiol        | 3                           | 6.23 (0.62) | 5.88 (1.09)  | 1.09  |
| VLS2-27 | Focus Diagnostics  | 6                           | 5.24 (0.91) | 4.97 (0.53)  | 2.50  |
|         | Lab Developed Test | 17                          | 4.70 (0.45) | 4.77 (0.46)  | 1.52  |
|         | Nanogen*           | 1                           | 5.10 (—)    | 5.10 (0.00)  | 0.00  |
|         | Other              | 5                           | 4.85 (0.71) | 4.79 (0.63)  | 1.86  |

|         |                    |    |             |             |      |
|---------|--------------------|----|-------------|-------------|------|
|         | Tib Molbiol        | 3  | 4.12 (1.41) | 4.81 (2.55) | 2.55 |
| VLS2-28 | Focus Diagnostics  | 6  | 6.46 (0.97) | 6.49 (0.70) | 2.91 |
|         | Lab Developed Test | 17 | 6.44 (1.17) | 6.07 (1.19) | 4.34 |
|         | Nanogen*           | 1  | 7.00 (—)    | 7.00 (0.00) | 0.00 |
|         | Other              | 5  | 7.31 (0.77) | 7.21 (1.27) | 1.76 |
|         | Tib Molbiol        | 3  | 7.10 (1.40) | 7.13 (2.80) | 2.80 |

8 N, number of labs; SD, standard deviation; IQR, interquartile range

9 \*Now ELITech

**Table S4.** HHV6 viral load by assay

| Sample  | Assay              | log <sub>10</sub> Copies/mL |             |              |       |
|---------|--------------------|-----------------------------|-------------|--------------|-------|
|         |                    | N                           | Mean (SD)   | Median (IQR) | Range |
| VLS2-09 | Focus Diagnostics  | 1                           | 3.07 (—)    | 3.07 (0.00)  | 0.00  |
|         | Lab Developed Test | 13                          | 5.29 (0.82) | 5.30 (0.92)  | 2.98  |
|         | Nanogen*           | 2                           | 5.55 (0.08) | 5.55 (0.11)  | 0.11  |
|         | Other              | 4                           | 5.03 (0.90) | 5.40 (1.08)  | 1.94  |
|         | Tib Molbiol        | 5                           | 5.15 (0.69) | 5.57 (1.08)  | 1.48  |
| VLS2-10 | Lab Developed Test | 13                          | 3.83 (0.74) | 3.93 (0.47)  | 2.83  |
|         | Nanogen*           | 2                           | 4.40 (0.28) | 4.40 (0.39)  | 0.39  |
|         | Other              | 4                           | 3.94 (0.62) | 4.23 (0.66)  | 1.28  |
|         | Tib Molbiol        | 4                           | 3.88 (0.60) | 4.10 (0.77)  | 1.33  |
| VLS2-20 | Focus Diagnostics  | 3                           | 4.15 (1.05) | 4.15 (2.09)  | 2.09  |
|         | Lab Developed Test | 14                          | 4.62 (0.52) | 4.64 (0.32)  | 2.36  |
|         | Nanogen*           | 2                           | 4.74 (0.19) | 4.74 (0.27)  | 0.27  |
|         | Other              | 4                           | 4.05 (0.52) | 4.04 (0.69)  | 1.27  |
|         | Tib Molbiol        | 4                           | 4.64 (0.97) | 4.44 (1.59)  | 2.00  |
| VLS2-29 | Focus Diagnostics  | 2                           | 4.40 (1.41) | 4.40 (2.00)  | 2.00  |
|         | Lab Developed Test | 14                          | 5.55 (0.67) | 5.69 (0.63)  | 2.99  |
|         | Nanogen*           | 1                           | 5.90 (—)    | 5.90 (0.00)  | 0.00  |
|         | Other              | 4                           | 5.66 (0.44) | 5.55 (0.68)  | 0.96  |
|         | Tib Molbiol        | 4                           | 5.02 (1.78) | 5.14 (2.46)  | 4.29  |
| VLS2-30 | Focus Diagnostics  | 2                           | 3.58 (0.96) | 3.58 (1.36)  | 1.36  |
|         | Lab Developed Test | 14                          | 4.00 (0.47) | 3.99 (0.63)  | 1.87  |
|         | Nanogen*           | 1                           | 4.50 (—)    | 4.50 (0.00)  | 0.00  |
|         | Other              | 4                           | 4.10 (0.55) | 3.89 (0.71)  | 1.17  |
|         | Tib Molbiol        | 4                           | 3.42 (1.69) | 3.61 (2.26)  | 4.08  |

11 N, number of labs; SD, standard deviation; IQR, interquartile range; \*Now ELITech
